# Supplementary material
Source: publisher figshare collection journal article supplement (https://gsajournals.figshare.com/ndownloader/files/18900899)
Supplement: Supplementary file 1 [file 18900899]

## Sheet: Sheet1
Table S12. FISH Summary Cell Counts
		Number of cells	Total number of dots	Average number of dots
Rep 1	JU775	725	1200	1.65517
	ED3042	269	596	2.21561
	ED3040	660	1245	1.88636
	MY6	521	908	1.7428
	PX174	483	1009	2.08903
	MY1	344	597	1.73547		Ave dots/cell Rep1	1.85043
Rep 2	JU775	253	329	1.3004
	ED3042	256	419	1.63672
	ED3040	218	357	1.63761
	MY6	246	405	1.64634
	PX174	153	234	1.52941
	MY1	107	170	1.58879		Ave dots/cell Rep2	1.55231
